# Supplementary material
Source: MDPI journal article supplement (https://www.mdpi.com/2306-5729/3/4/41)
Supplement: s1 [file s1]

Archive with 2 entries (2 files):
- Revised SI file DATA.pdf
- SI-2 file DATA.xls
