# Supplementary material
Source: MDPI journal article supplement (https://www.mdpi.com/2306-5729/3/4/41)
Supplement: s1 [file s1 › Revised SI file DATA.pdf]

## SUPPLEMENTARY INFORMATION FILE

### Measurement and numerical modelling of cell-free protein synthesis: combinatorial block-variants of the PURE system

Paolo Carrara <sup>1</sup>, Emiliano Altamura <sup>2</sup>, Francesca D'Angelo <sup>1</sup>, Fabio Mavelli <sup>2</sup> and Pasquale Stano <sup>3,\*</sup>

<sup>1</sup> Sciences Department, Roma Tre University; V.le G. Marconi 446, I-00146 Rome, Italy

<sup>2</sup> Chemistry Department, University of Bari "Aldo Moro"; Via Orabona 4, I-70125 Bari, Italy

<sup>3</sup> DiSTeBA, University of Salento; Ecotekne, I-73100 Lecce, Italy

Correspondence: [pasquale.stano@unisalento.it](mailto:pasquale.stano@unisalento.it); Tel.: +39-0832-298-709

#### Table of Content

##### Supplementary Tables S1-S3

**Table S1.** Composition of PURE system "variants", sample IDs explained

**Table S2.** Composition of *in silico* PURE system "variants" in terms of modelling species

**Table S3.** Best-fit parameters referring to data presented in Figure 6a and Figure S3

**Table S4.** Results from linear and linearized models (Equation 4) and PCA

##### Supplementary Figures S1

**Figure S1.** Mechanisms of the *in silico* PURE system model.

**Table S1.** Correspondence between sample ID and composition of PURE system block-variants.

| sample ID | D | E | B | mix "D" = [DNA], nM | mix "E"                    | mix "B"                    |
|-----------|---|---|---|---------------------|----------------------------|----------------------------|
| 333       | 3 | 3 | 3 | 22.0                | 3/3 of stock concentration | 3/3 of stock concentration |
| 332       | 3 | 3 | 2 | 22.0                | 3/3 of stock concentration | 2/3 of stock concentration |
| 331       | 3 | 3 | 1 | 22.0                | 3/3 of stock concentration | 1/3 of stock concentration |
| 323       | 3 | 2 | 3 | 22.0                | 2/3 of stock concentration | 3/3 of stock concentration |
| 322       | 3 | 2 | 2 | 22.0                | 2/3 of stock concentration | 2/3 of stock concentration |
| 321       | 3 | 2 | 1 | 22.0                | 2/3 of stock concentration | 1/3 of stock concentration |
| 313       | 3 | 1 | 3 | 22.0                | 1/3 of stock concentration | 3/3 of stock concentration |
| 312       | 3 | 1 | 2 | 22.0                | 1/3 of stock concentration | 2/3 of stock concentration |
| 311       | 3 | 1 | 1 | 22.0                | 1/3 of stock concentration | 1/3 of stock concentration |
| 233       | 2 | 3 | 3 | 14.7                | 3/3 of stock concentration | 3/3 of stock concentration |
| 232       | 2 | 3 | 2 | 14.7                | 3/3 of stock concentration | 2/3 of stock concentration |
| 231       | 2 | 3 | 1 | 14.7                | 3/3 of stock concentration | 1/3 of stock concentration |
| 223       | 2 | 2 | 3 | 14.7                | 2/3 of stock concentration | 3/3 of stock concentration |
| 222       | 2 | 2 | 2 | 14.7                | 2/3 of stock concentration | 2/3 of stock concentration |
| 221       | 2 | 2 | 1 | 14.7                | 2/3 of stock concentration | 1/3 of stock concentration |
| 213       | 2 | 1 | 3 | 14.7                | 1/3 of stock concentration | 3/3 of stock concentration |
| 212       | 2 | 1 | 2 | 14.7                | 1/3 of stock concentration | 2/3 of stock concentration |
| 211       | 2 | 1 | 1 | 14.7                | 1/3 of stock concentration | 1/3 of stock concentration |
| 133       | 1 | 3 | 3 | 7.3                 | 3/3 of stock concentration | 3/3 of stock concentration |
| 132       | 1 | 3 | 2 | 7.3                 | 3/3 of stock concentration | 2/3 of stock concentration |
| 131       | 1 | 3 | 1 | 7.3                 | 3/3 of stock concentration | 1/3 of stock concentration |
| 123       | 1 | 2 | 3 | 7.3                 | 2/3 of stock concentration | 3/3 of stock concentration |
| 122       | 1 | 2 | 2 | 7.3                 | 2/3 of stock concentration | 2/3 of stock concentration |
| 121       | 1 | 2 | 1 | 7.3                 | 2/3 of stock concentration | 1/3 of stock concentration |
| 113       | 1 | 1 | 3 | 7.3                 | 1/3 of stock concentration | 3/3 of stock concentration |
| 112       | 1 | 1 | 2 | 7.3                 | 1/3 of stock concentration | 2/3 of stock concentration |
| 111       | 1 | 1 | 1 | 7.3                 | 1/3 of stock concentration | 1/3 of stock concentration |

**Table S2. Results of statistical analyses.** Linear and non-linear (linearized Log) multiple regression parameters of 27 PURE system variants. Bold characters indicate statistical significance ( $p < 0.05$ )

|                                     | $\beta_D$                       | $\beta_E$                                        | $\beta_B$                                        |
|-------------------------------------|---------------------------------|--------------------------------------------------|--------------------------------------------------|
| End-point [eGFP]<br>( $\mu$ M)      |                                 |                                                  |                                                  |
| Linear model                        | $(-0.1 \pm 0.8) \times 10^{-2}$ | <b><math>(9.8 \pm 0.8) \times 10^{-2}</math></b> | <b><math>(4.5 \pm 0.8) \times 10^{-2}</math></b> |
| Log model                           | $(-0.4 \pm 5) \times 10^{-2}$   | <b><math>(53 \pm 7) \times 10^{-2}</math></b>    | <b><math>(21 \pm 6) \times 10^{-2}</math></b>    |
| Inflection time<br>(s)              |                                 |                                                  |                                                  |
| Linear model                        | $0 \pm 240$                     | <b><math>-850 \pm 243</math></b>                 | <b><math>-1130 \pm 243</math></b>                |
| Log model                           | $(0.8 \pm 7) \times 10^{-2}$    | <b><math>(-55 \pm 7) \times 10^{-2}</math></b>   | <b><math>(-72 \pm 8) \times 10^{-2}</math></b>   |
| Max production rate<br>( $\mu$ M/s) |                                 |                                                  |                                                  |
| Linear model                        | $(-3 \pm 5) \times 10^{-6}$     | <b><math>(45 \pm 5) \times 10^{-6}</math></b>    | <b><math>(22 \pm 5) \times 10^{-6}</math></b>    |
| Log model                           | $(-7 \pm 6) \times 10^{-2}$     | <b><math>(69 \pm 10) \times 10^{-2}</math></b>   | <b><math>(26 \pm 7) \times 10^{-2}</math></b>    |

**Comment to PCA.** PCA has been carried out on the variables end-point [eGFP], inflection time, max production rate,  $a_D$ ,  $a_E$ ,  $a_B$  (the latter are the dilution factors of D, E, B sub-groups, corresponding to values as 3/3, 2/3 or 1/3). PCA confirms the role of group E and group B compounds to determine the outcome of protein synthesis in the explored concentration range (whereas DNA does not play a role in the 7-22 nM concentration). Interestingly,  $a_E$  and  $a_B$  have almost orthogonal projections in the PC1-vs-PC2 plane, and are best distinguished along PC2. The experimental dataset, when represented over the PCs, appears as a regular point array, without cluster formation.

**Table S3.** Concentration of the species in the *in silico* PURE system model.

|       |         | stock conc.   | index = 3     | index = 2     | index = 1     |
|-------|---------|---------------|---------------|---------------|---------------|
| Group | Species | $\mu\text{M}$ | $\mu\text{M}$ | $\mu\text{M}$ | $\mu\text{M}$ |
| D     | DNA     | 0.022         | 0.022         | 0.015         | 0.007         |
|       |         |               |               |               |               |
| E     | TXcat   | 0.100         | 0.100         | 0.067         | 0.033         |
| E     | TLcat   | 1.719         | 1.719         | 1.146         | 0.573         |
| E     | RScat   | 0.160         | 0.160         | 0.107         | 0.053         |
| E     | ENcat   | 0.080         | 0.080         | 0.053         | 0.027         |
|       |         |               |               |               |               |
| B     | A       | 300.000       | 300.000       | 200.000       | 100.000       |
| B     | T       | 1.900         | 1.900         | 1.267         | 0.633         |
| B     | NTP     | 1500.000      | 1500.000      | 1000.000      | 500.000       |
| B     | CP      | 20000.000     | 20000.000     | 13333.333     | 6666.667      |

**Table S4.** Best fit parameters for the simultaneous fitting of 27 eGFP-vs-time profiles (Figure 4b), according to the model of Figure S1.

|    |                          |                 |         |
|----|--------------------------|-----------------|---------|
| 1  | > Kinetic Constants      |                 |         |
| 2  | k_{TX}                   | = 1.671 1/s     |         |
| 3  | k_{TL}                   | = 7.176e-02 1/s | Fitting |
| 4  | k_{RS}                   | = 6.200 1/s     |         |
| 5  | k_{EN}                   | = 100.000 1/s   |         |
| 6  | k_{nt,deg}               | = 7.918e-05 1/s |         |
| 7  | k_{TL,deg}               | = 4.915e-04 1/s | Fitting |
| 8  | k_{a,fol}                | = 6.767e-03 1/s | Fitting |
| 9  | k_{a,mat}                | = 4.738e-03 1/s | Fitting |
| 10 | K_{TX,DNA}               | = 5.000e-03 uM  |         |
| 11 | K_{TX,NTP}               | = 80.000 uM     |         |
| 12 | K_{TL,nt}                | = 16.634 uM     | Fitting |
| 13 | K_{TL,AT}                | = 10.000 uM     |         |
| 14 | K_{TL,NTP}               | = 10.000 uM     |         |
| 15 | K_{RS,A}                 | = 23.000 uM     |         |
| 16 | K_{RS,T}                 | = 7.000e-01 uM  |         |
| 17 | K_{RS,NTP}               | = 200.000 uM    |         |
| 18 | K_{EN,CP}                | = 200.000 uM    |         |
| 19 | K_{EN,NXP}               | = 40.000 uM     |         |
| 20 |                          |                 |         |
| 21 | > Hill Coefficients      |                 |         |
| 22 | hTL(nt)                  | = 1.274         | Fitting |
| 23 | hTL(NTP)                 | = 2.972         | Fitting |
| 24 | hTL(AT)                  | = 0.703         | Fitting |
| 25 |                          |                 |         |
| 26 | > Initial concentrations |                 |         |
| 27 | [NTP]o                   | = 1500.000 uM   |         |
| 28 | [A]o                     | = 300.000 uM    |         |
| 29 | [T]o                     | = 1.900 uM      |         |
| 30 | [CP]o                    | = 20000.000 uM  |         |
| 31 | [TL]o                    | = 1.721 uM      | Fitting |
| 32 |                          |                 |         |
| 33 | > Enzyme concentrations  |                 |         |
| 34 | C(DNA)                   | = 2.000e-02 uM  |         |
| 35 | C(TX)                    | = 1.000e-01 uM  |         |
| 36 | C(Rs)                    | = 1.600e-01 uM  |         |
| 37 | C(En)                    | = 8.000e-02 uM  |         |
| 38 | length                   | = 238 aa        |         |
| 39 | n. bases                 | = 4             |         |
| 40 | n. aa                    | = 20            |         |
| 41 | n. tRNA                  | = 46            |         |
| 42 |                          |                 |         |

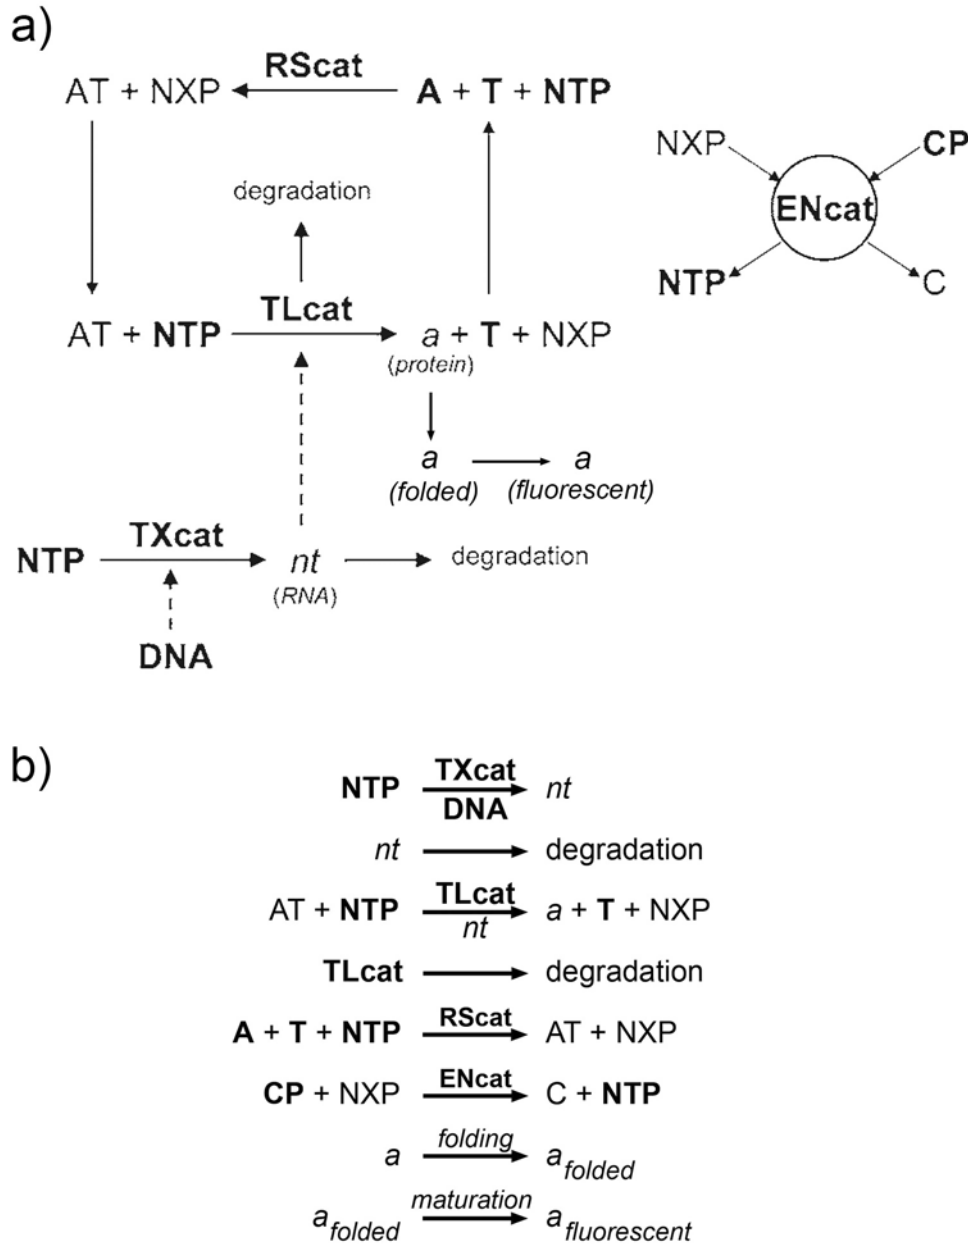

**Figure S1. In silico PURE system model.** General view of the model presented here. (a) The four modules (TX, TL, RS, EN) are interconnected by means of reactants, templates, and energizing molecules. In bold, the molecules initially present in the PURE system. NTP, nucleoside triphosphate;  $nt$ , polymerized nucleotides (mRNA); AT, aminoacyl tRNA; A, amino acid; T, tRNA;  $a$ , polymerized amino acid (protein); NXP, nucleoside mono- or diphosphate; CP, creatine phosphate; C, creatine; TXcat, TLcat, RScat, ENcat represent, respectively, the catalysts (or the set of catalysts) for transcription, translation, aminoacyl-tRNA synthesis, and energy recycling. Dashed lines templating interaction; thick solid lines the reactions. Reproduced from “Mavelli, F.; Marangoni, R.; Stano, P. A Simple Protein Synthesis Model for the PURE System Operation. *Bull. Math. Biol.* **2015**, 77, 1185–1212” ©2015 Springer, with the permission of Springer. (b) The six reactions that compose the kinetic model. For each, a Michaelis-Menten-like rate law has been used (exceptions: the two degradation reactions, which have been modelled as pseudo-first order reactions).
