# Supplementary material
Source: MDPI journal article supplement (https://www.mdpi.com/2306-5729/3/4/41)
Supplement: s1 [file s1 › SI-2 file DATA.xls]

## Sheet: Foglio1
Sample ID (D-E-B)
The first digit refers to the dilution of D (DNA): 3 means not diluted (22 nM), 2 means 2/3 diluted (14.7 nM), 1 means 1/3 diluted (7.3 nM)
The second digit refers to the dilution of group E reactants (enzymes): 3 means not diluted, 2 means 2/3 diluted, 1 means 1/3 diluted
The third digit refers to the dilution of group B reactants (amino acids, NTPs, tRNAs): 3 means not diluted, 2 means 2/3 diluted, 1 means 1/3 diluted
See Table S1 in SI file for further information. The concentration of not diluted PURE system can be found in
Shimizu, Y.; Kanamori, T.; Ueda, T. Protein synthesis by pure translation systems. Methods 2005, 36, 299–304, doi:10.1016/j.ymeth.2005.04.006
	1	2	3	4	5	6	7	8	9	10	11	12	13	14	15	16	17	18	19	20	21	22	23	24	25	26	27
sample ID	333	332	331	323	322	321	313	312	311	233	232	231	223	222	221	213	212	211	133	132	131	123	122	121	113	112	111
time	[eGFP]	[eGFP]	[eGFP]	[eGFP]	[eGFP]	[eGFP]	[eGFP]	[eGFP]	[eGFP]	[eGFP]	[eGFP]	[eGFP]	[eGFP]	[eGFP]	[eGFP]	[eGFP]	[eGFP]	[eGFP]	[eGFP]	[eGFP]	[eGFP]	[eGFP]	[eGFP]	[eGFP]	[eGFP]	[eGFP]	[eGFP]
seconds	uM	uM	uM	uM	uM	uM	uM	uM	uM	uM	uM	uM	uM	uM	uM	uM	uM	uM	uM	uM	uM	uM	uM	uM	uM	uM	uM
210	0.00104	0.00125	0.00114	0.00253	0.00188	0.00181	0.00267	0.00207	0.00206	0.000952639	0.000916401	0.00196	0.00164	0.00116	0.00215	0.00275	0.00254	0.00211	0.000874733	0.000149842	0.00154	0.00207	0.00209	0.00225	0.00317	0.00242	0.00227
420	0.00117	0.00153	0.00123	0.00273	0.002	0.00187	0.00281	0.00215	0.00205	0.00126	0.00113	0.00196	0.00175	0.00153	0.00218	0.00289	0.00269	0.00214	0.00106	0.000228117	0.00169	0.00235	0.00228	0.00234	0.00325	0.00254	0.0023
630	0.00537	0.00259	0.00122	0.00801	0.0023	0.00187	0.00282	0.00217	0.00208	0.00807	0.00155	0.00195	0.00276	0.0019	0.00226	0.00302	0.00274	0.00219	0.00385	0.00121	0.00199	0.00348	0.0029	0.00237	0.00331	0.00258	0.00235
840	0.01974	0.01206	0.0022	0.02294	0.00605	0.00195	0.00325	0.00225	0.00211	0.02781	0.0057	0.00216	0.00753	0.00444	0.00226	0.0031	0.00286	0.00219	0.01538	0.01054	0.00234	0.00985	0.00562	0.00233	0.0036	0.00257	0.00235
1050	0.03969	0.02945	0.00605	0.04029	0.01445	0.00199	0.0049	0.00257	0.00214	0.05463	0.01888	0.00318	0.01693	0.01191	0.00232	0.00356	0.00342	0.00216	0.0346	0.02798	0.00429	0.02127	0.01197	0.00243	0.00473	0.00289	0.00242
1260	0.06184	0.05142	0.01367	0.05734	0.02477	0.002	0.00775	0.00406	0.00218	0.08286	0.03859	0.00648	0.02979	0.02457	0.00236	0.0047	0.00509	0.00219	0.0583	0.0506	0.00872	0.03543	0.02174	0.00242	0.007	0.00357	0.00246
1470	0.08443	0.07454	0.02384	0.07359	0.03611	0.00215	0.01183	0.00686	0.0022	0.11113	0.06134	0.01315	0.04455	0.04095	0.00269	0.00687	0.00789	0.00222	0.08408	0.07504	0.01616	0.05088	0.0335	0.00257	0.0103	0.00488	0.00247
1680	0.107	0.09691	0.03589	0.0889	0.04779	0.00229	0.01667	0.01041	0.00221	0.13677	0.08421	0.0225	0.05914	0.059	0.00363	0.00973	0.01168	0.00224	0.10925	0.09944	0.02573	0.06649	0.04616	0.00282	0.01439	0.00693	0.00249
1890	0.12775	0.11815	0.04933	0.10352	0.05966	0.00267	0.0218	0.01451	0.0022	0.15974	0.10613	0.03399	0.07315	0.0775	0.0053	0.01324	0.0162	0.00227	0.13282	0.12192	0.0368	0.08156	0.05961	0.00347	0.01879	0.00974	0.00253
2100	0.14671	0.13705	0.06318	0.11675	0.07103	0.00351	0.02676	0.01873	0.00224	0.17943	0.1264	0.04666	0.08591	0.09522	0.00799	0.01692	0.02121	0.00226	0.1535	0.14229	0.04933	0.09552	0.07281	0.00449	0.02325	0.01312	0.0026
2310	0.16427	0.15453	0.07735	0.12916	0.08232	0.00463	0.03156	0.02314	0.00225	0.19699	0.14535	0.05976	0.09799	0.11234	0.01172	0.02061	0.02612	0.00231	0.17206	0.16095	0.06229	0.10874	0.08553	0.00597	0.02753	0.01687	0.0026
2520	0.17877	0.1701	0.09091	0.14039	0.09288	0.00629	0.03605	0.02737	0.00227	0.21161	0.16231	0.07238	0.10835	0.12757	0.01597	0.02401	0.03104	0.00231	0.18775	0.17662	0.0747	0.12021	0.09727	0.00816	0.03164	0.02089	0.00262
2730	0.19245	0.18388	0.10446	0.15076	0.10294	0.00825	0.04014	0.03156	0.00226	0.224	0.17762	0.08477	0.11819	0.14203	0.02117	0.02737	0.0357	0.0023	0.20187	0.19091	0.08662	0.13091	0.10856	0.01071	0.03543	0.02493	0.00269
2940	0.20411	0.19622	0.11709	0.1605	0.11232	0.01061	0.04403	0.03575	0.00228	0.23368	0.19095	0.0961	0.12709	0.15513	0.0263	0.03042	0.04021	0.00235	0.21305	0.20279	0.09833	0.1408	0.11906	0.01387	0.0389	0.02892	0.00269
3150	0.21439	0.20751	0.12912	0.16913	0.12115	0.01311	0.04763	0.03965	0.00231	0.24228	0.20302	0.10681	0.13499	0.16723	0.03178	0.03321	0.04435	0.00235	0.22256	0.21313	0.10909	0.1493	0.12854	0.01712	0.04209	0.03282	0.00269
3360	0.22295	0.21712	0.1401	0.17664	0.12918	0.01574	0.05088	0.04338	0.00231	0.24857	0.21338	0.11692	0.14207	0.17798	0.03706	0.03578	0.04826	0.00237	0.23051	0.22178	0.11905	0.15734	0.13758	0.02085	0.04522	0.03685	0.00276
3570	0.22953	0.22498	0.15026	0.18325	0.13689	0.0187	0.05382	0.04684	0.00232	0.25322	0.22215	0.12579	0.14838	0.18795	0.0424	0.03811	0.05208	0.00237	0.23716	0.22912	0.1286	0.16414	0.14577	0.02456	0.04776	0.04037	0.00281
3780	0.23427	0.23141	0.15964	0.189	0.14384	0.02165	0.0567	0.05028	0.00233	0.25732	0.2301	0.13457	0.15401	0.19662	0.04752	0.04027	0.05569	0.00242	0.24333	0.23592	0.13649	0.17002	0.15339	0.0284	0.0503	0.044	0.00282
3990	0.23848	0.23646	0.16786	0.19423	0.15035	0.02466	0.05917	0.05341	0.00239	0.26057	0.2362	0.14175	0.15902	0.20448	0.05231	0.04226	0.05912	0.00245	0.2484	0.24168	0.14448	0.17516	0.16045	0.03231	0.05244	0.04743	0.00285
4200	0.24174	0.24053	0.17525	0.19828	0.15626	0.02765	0.06163	0.05649	0.00238	0.26305	0.24137	0.14839	0.16348	0.21118	0.05712	0.0442	0.06225	0.00248	0.25317	0.24653	0.15111	0.17959	0.1666	0.03612	0.05462	0.0507	0.00287
4410	0.2444	0.24382	0.18144	0.20177	0.16136	0.0305	0.06374	0.05944	0.00243	0.26512	0.24547	0.15434	0.1672	0.21662	0.06138	0.0458	0.06517	0.00252	0.25659	0.2508	0.15697	0.18348	0.17221	0.03989	0.05659	0.05394	0.00287
4620	0.24648	0.24628	0.18663	0.20474	0.16627	0.03324	0.06564	0.06215	0.00243	0.2666	0.24855	0.1596	0.17026	0.22135	0.06545	0.04727	0.06808	0.00253	0.25977	0.25399	0.16237	0.18703	0.17711	0.04351	0.05812	0.05679	0.0029
4830	0.24875	0.24871	0.19091	0.20716	0.17052	0.03601	0.06749	0.06463	0.00248	0.26848	0.25179	0.16424	0.17269	0.22505	0.06925	0.04876	0.07092	0.00262	0.26226	0.2571	0.16708	0.1902	0.1819	0.0469	0.0598	0.05965	0.00293
5040	0.25036	0.25061	0.1948	0.20949	0.17455	0.03872	0.0691	0.06708	0.00244	0.26992	0.25395	0.16817	0.17514	0.22821	0.07277	0.05007	0.07364	0.0027	0.26416	0.25962	0.17099	0.19308	0.18724	0.05032	0.06114	0.06228	0.00297
5250	0.25213	0.2523	0.19802	0.21109	0.17804	0.04113	0.07057	0.06932	0.00246	0.27129	0.25619	0.17132	0.17678	0.23083	0.07593	0.0513	0.076	0.0028	0.26606	0.26162	0.1744	0.19563	0.19049	0.05351	0.06257	0.06496	0.003
5460	0.25306	0.25391	0.20105	0.2128	0.18125	0.04343	0.07187	0.07151	0.00249	0.27266	0.25764	0.1741	0.17839	0.23333	0.07901	0.05227	0.07829	0.00285	0.26789	0.26341	0.17759	0.19813	0.19383	0.05677	0.06367	0.06752	0.00304
5670	0.25457	0.2552	0.20324	0.21417	0.18382	0.04569	0.07315	0.07343	0.00252	0.2739	0.25956	0.17665	0.18005	0.23514	0.08161	0.05334	0.08054	0.00296	0.26928	0.26519	0.17995	0.2001	0.196	0.05962	0.06481	0.06981	0.00304
5880	0.25564	0.25629	0.20511	0.21537	0.18598	0.04774	0.07418	0.07497	0.00254	0.27456	0.26056	0.1784	0.18105	0.2364	0.08384	0.05412	0.08243	0.00303	0.26991	0.2659	0.18202	0.20162	0.19786	0.06224	0.06596	0.0719	0.00306
6090	0.25668	0.25742	0.20697	0.2166	0.18821	0.04977	0.07514	0.07666	0.00257	0.27575	0.26175	0.18053	0.1822	0.23836	0.08616	0.05494	0.08457	0.00311	0.27151	0.26747	0.1842	0.20337	0.19991	0.06478	0.06666	0.07392	0.00312
6300	0.25763	0.25821	0.20846	0.21735	0.19002	0.05168	0.07588	0.07814	0.00257	0.27626	0.26253	0.18214	0.18268	0.23943	0.08822	0.05558	0.08621	0.00324	0.27258	0.26802	0.18571	0.20484	0.20115	0.06721	0.06762	0.07587	0.00311
6510	0.25843	0.25921	0.20983	0.21845	0.19168	0.0533	0.07672	0.07947	0.00261	0.27734	0.26376	0.1836	0.18392	0.24081	0.09035	0.05644	0.088	0.00336	0.27341	0.26933	0.18696	0.20597	0.20276	0.06921	0.0683	0.07778	0.00318
6720	0.25945	0.26032	0.21083	0.21926	0.19291	0.05496	0.07751	0.08079	0.0026	0.27809	0.26488	0.18487	0.1845	0.24191	0.09193	0.05702	0.08958	0.00345	0.2744	0.27038	0.18832	0.20722	0.20418	0.07153	0.06909	0.07947	0.0032
6930	0.26039	0.26112	0.21183	0.21998	0.19439	0.05658	0.07794	0.08183	0.00267	0.27862	0.26541	0.18589	0.18529	0.24266	0.09346	0.05761	0.09064	0.00361	0.27512	0.27108	0.18945	0.20793	0.20507	0.07314	0.06968	0.08092	0.00327
7140	0.26113	0.26167	0.21255	0.22081	0.1954	0.0579	0.07856	0.08286	0.00265	0.27942	0.26627	0.18687	0.18584	0.2436	0.09492	0.05815	0.09197	0.0037	0.27568	0.27185	0.19021	0.20885	0.20602	0.07492	0.07031	0.08244	0.0033
7350	0.26158	0.26232	0.21369	0.22145	0.19645	0.05924	0.07898	0.08387	0.00269	0.27954	0.26698	0.18802	0.18653	0.24467	0.09633	0.05859	0.09305	0.00387	0.27619	0.27256	0.19097	0.20982	0.20716	0.07659	0.07085	0.08384	0.00332
7560	0.26241	0.26312	0.21402	0.22211	0.1973	0.06035	0.0794	0.08469	0.00268	0.28002	0.26755	0.18865	0.18699	0.24547	0.09756	0.05906	0.09393	0.004	0.27673	0.27305	0.19179	0.21052	0.20798	0.07794	0.07126	0.08495	0.00336
7770	0.26285	0.26353	0.2148	0.22252	0.19826	0.06156	0.07974	0.08533	0.00273	0.2806	0.26792	0.18916	0.18759	0.24606	0.09854	0.05933	0.09486	0.00417	0.27742	0.27353	0.19241	0.2109	0.20829	0.07949	0.07167	0.08629	0.00336
7980	0.26349	0.26399	0.21525	0.22297	0.19871	0.06247	0.08009	0.08599	0.00276	0.28065	0.26848	0.18951	0.18769	0.24642	0.09951	0.05968	0.09553	0.00424	0.27759	0.27392	0.19304	0.21159	0.20908	0.08082	0.0719	0.08718	0.00341
8190	0.26397	0.26487	0.21589	0.22347	0.19947	0.06346	0.08068	0.08675	0.00282	0.28178	0.26918	0.19041	0.18825	0.24697	0.10064	0.06024	0.09642	0.00442	0.27845	0.27482	0.19344	0.21229	0.20997	0.08196	0.07232	0.08849	0.00344
8400	0.26474	0.26513	0.21626	0.2242	0.20014	0.06452	0.08085	0.08741	0.00283	0.28201	0.26976	0.19081	0.18861	0.24813	0.10156	0.06035	0.0968	0.00456	0.27878	0.27521	0.19384	0.21254	0.21014	0.08317	0.07265	0.08929	0.00349
8610	0.26465	0.26597	0.21703	0.22443	0.20078	0.06516	0.08123	0.0881	0.00285	0.2824	0.2701	0.19123	0.18903	0.24833	0.10213	0.06081	0.09741	0.00472	0.27945	0.27589	0.19442	0.21331	0.21087	0.08441	0.0731	0.09017	0.00347
8820	0.26514	0.26612	0.21736	0.22507	0.20109	0.06599	0.08157	0.08841	0.00287	0.28308	0.27056	0.19175	0.18946	0.24906	0.10296	0.06103	0.09791	0.00484	0.28002	0.27627	0.19458	0.21371	0.21128	0.08541	0.07346	0.09113	0.00351
9030	0.26544	0.2668	0.21758	0.22548	0.20177	0.06663	0.0818	0.08882	0.00291	0.2833	0.2709	0.19214	0.18986	0.24939	0.10369	0.0612	0.09846	0.00495	0.27998	0.27627	0.19495	0.214	0.21196	0.08632	0.07363	0.09175	0.00354
9240	0.26633	0.26689	0.21797	0.22589	0.20245	0.06728	0.08212	0.08915	0.00295	0.28403	0.2714	0.19272	0.19028	0.24995	0.10413	0.06139	0.09891	0.00513	0.28082	0.27682	0.19531	0.21443	0.21228	0.08713	0.07392	0.0924	0.0036
9450	0.26647	0.26732	0.21796	0.22593	0.20272	0.06805	0.08228	0.08957	0.003	0.28407	0.27156	0.19283	0.1905	0.25034	0.1046	0.06171	0.09921	0.00529	0.28095	0.27705	0.1957	0.21485	0.2126	0.08792	0.07409	0.09312	0.0037
9660	0.26707	0.26756	0.21858	0.22653	0.20332	0.06852	0.08252	0.09013	0.00304	0.28415	0.27173	0.19318	0.19088	0.25079	0.1052	0.06196	0.09964	0.00542	0.28114	0.27729	0.19566	0.21508	0.21315	0.08863	0.07425	0.09363	0.00372
9870	0.26705	0.26804	0.21876	0.22648	0.20347	0.0689	0.08274	0.09047	0.00305	0.28457	0.27241	0.1934	0.19116	0.2509	0.10568	0.06202	0.09994	0.00559	0.2817	0.2777	0.19588	0.21562	0.2134	0.08939	0.07451	0.09404	0.00371
10080	0.26763	0.26841	0.2192	0.22708	0.20412	0.06933	0.08293	0.09092	0.00311	0.28504	0.27254	0.19368	0.1913	0.25135	0.10608	0.06224	0.10023	0.00567	0.28215	0.27817	0.19608	0.21598	0.21385	0.08998	0.07456	0.09451	0.00376
10290	0.26796	0.2684	0.21923	0.22721	0.20417	0.06995	0.08311	0.09093	0.00309	0.28522	0.27254	0.19366	0.19137	0.25192	0.10633	0.06239	0.10069	0.00583	0.28229	0.27831	0.19619	0.21621	0.21406	0.09056	0.07482	0.09504	0.00383
10500	0.26817	0.26892	0.21967	0.22748	0.20474	0.07032	0.08343	0.0913	0.00313	0.28564	0.27303	0.19429	0.19178	0.25199	0.10692	0.06262	0.10098	0.00595	0.28284	0.27861	0.19687	0.21664	0.2145	0.09099	0.07518	0.09533	0.00386
10710	0.26853	0.26942	0.21995	0.22795	0.20518	0.07078	0.08351	0.09152	0.00318	0.28586	0.2734	0.1945	0.19215	0.25231	0.10723	0.06277	0.10113	0.00603	0.28319	0.27882	0.19661	0.21678	0.21486	0.09175	0.07538	0.09575	0.00393
10920	0.26901	0.26926	0.21997	0.22803	0.20529	0.07111	0.08363	0.09181	0.00322	0.286	0.27349	0.19465	0.19223	0.25283	0.10734	0.06288	0.10144	0.00614	0.28324	0.27872	0.19682	0.21694	0.2148	0.09205	0.07533	0.09594	0.00394
11130	0.26907	0.26959	0.22056	0.22838	0.20566	0.07144	0.08392	0.09197	0.00326	0.28616	0.27386	0.19481	0.19271	0.25318	0.1079	0.06296	0.10172	0.00628	0.28371	0.27942	0.19717	0.21728	0.21521	0.0925	0.07557	0.0963	0.00398
11340	0.26954	0.26987	0.22072	0.2287	0.20605	0.07201	0.08404	0.09219	0.00327	0.28655	0.2742	0.1949	0.19286	0.25319	0.10816	0.06314	0.10189	0.00636	0.28388	0.27951	0.19717	0.21761	0.21581	0.09305	0.07587	0.0967	0.00401
11550	0.26989	0.27016	0.22091	0.22899	0.20635	0.07193	0.08406	0.09256	0.00333	0.28685	0.27434	0.19523	0.19281	0.25361	0.10832	0.06323	0.10206	0.00647	0.28413	0.27969	0.19738	0.21802	0.21588	0.09316	0.07583	0.09692	0.00405
11760	0.27021	0.27044	0.22105	0.22921	0.20672	0.0725	0.08438	0.09269	0.00334	0.28704	0.2745	0.19558	0.19353	0.25393	0.1087	0.06339	0.10249	0.00657	0.28439	0.27996	0.19774	0.21832	0.21629	0.09351	0.07617	0.09728	0.00409
11970	0.27012	0.27036	0.22129	0.22951	0.20707	0.07273	0.08453	0.09276	0.00341	0.2872	0.27465	0.1957	0.19352	0.25387	0.10873	0.06362	0.10258	0.0066	0.28475	0.28022	0.19765	0.21853	0.21658	0.09381	0.07624	0.0974	0.00415
12180	0.27039	0.27069	0.22142	0.22962	0.20713	0.07293	0.08473	0.09307	0.00339	0.28727	0.2751	0.19572	0.19353	0.25422	0.10904	0.06374	0.10277	0.00672	0.28496	0.28026	0.19783	0.21872	0.21655	0.09445	0.07626	0.09763	0.00417
12390	0.27107	0.27067	0.22154	0.22981	0.2072	0.07322	0.08466	0.09306	0.00346	0.28757	0.27523	0.19604	0.19381	0.25431	0.10944	0.06371	0.10294	0.00681	0.28506	0.28012	0.19815	0.21893	0.21688	0.0945	0.0764	0.09794	0.00419
12600	0.27138	0.27103	0.2218	0.23036	0.20762	0.07355	0.08479	0.09324	0.00349	0.28774	0.27553	0.19587	0.19396	0.25477	0.10966	0.06391	0.10312	0.00689	0.2854	0.28046	0.19819	0.21906	0.21694	0.09472	0.07649	0.09813	0.00422
12810	0.27165	0.27128	0.22196	0.2304	0.2078	0.07374	0.08512	0.09344	0.00348	0.28841	0.27568	0.19635	0.19431	0.25498	0.10973	0.06394	0.10327	0.00694	0.28598	0.28072	0.19826	0.21951	0.21741	0.09498	0.07676	0.09835	0.00428
13020	0.27187	0.27129	0.2222	0.23065	0.20814	0.07388	0.0851	0.09378	0.00355	0.28803	0.27559	0.1962	0.19438	0.25511	0.10997	0.06407	0.10346	0.00702	0.28558	0.28036	0.19853	0.21963	0.21739	0.09515	0.07674	0.09835	0.00428
13230	0.27194	0.27166	0.22222	0.2309	0.20835	0.07404	0.0853	0.09405	0.00355	0.28812	0.27569	0.19642	0.19445	0.25534	0.11014	0.06421	0.10369	0.00707	0.28588	0.2808	0.19837	0.21984	0.21765	0.09551	0.07687	0.09881	0.00437
13440	0.27228	0.27142	0.22241	0.23097	0.20846	0.07429	0.08533	0.0941	0.00362	0.28845	0.27605	0.19654	0.19461	0.25537	0.11038	0.06432	0.10363	0.00718	0.28588	0.28074	0.19889	0.21995	0.21779	0.0956	0.077	0.09894	0.00436
13650	0.27237	0.27143	0.22267	0.23119	0.20876	0.07446	0.08552	0.0942	0.00365	0.28853	0.27592	0.19666	0.19473	0.25532	0.11042	0.06437	0.10394	0.0072	0.28608	0.2811	0.19902	0.22025	0.21795	0.09584	0.07699	0.09917	0.0044
13860	0.27268	0.27156	0.22275	0.23123	0.20881	0.07458	0.08548	0.09427	0.00364	0.28851	0.27613	0.1969	0.19486	0.25554	0.11054	0.06448	0.10391	0.00723	0.28601	0.2809	0.19878	0.2203	0.2179	0.09588	0.07729	0.09918	0.00443
14070	0.2726	0.27166	0.22289	0.23153	0.20924	0.07485	0.08563	0.09441	0.00367	0.28874	0.27615	0.1968	0.19529	0.25574	0.1108	0.0646	0.10421	0.00734	0.2863	0.28094	0.19875	0.22035	0.2183	0.09636	0.07736	0.09933	0.00442
14280	0.27291	0.27181	0.22295	0.23163	0.2091	0.07483	0.08587	0.09453	0.0037	0.28888	0.27615	0.19698	0.19531	0.25574	0.11093	0.06464	0.10417	0.00739	0.28663	0.28108	0.19884	0.22061	0.21818	0.09631	0.0773	0.09948	0.0045
14490	0.2733	0.2721	0.22313	0.23168	0.20949	0.07502	0.08596	0.09473	0.00372	0.28924	0.27639	0.1972	0.19563	0.25608	0.11113	0.06476	0.10438	0.00739	0.2867	0.28125	0.19912	0.22082	0.21869	0.09646	0.07736	0.09962	0.00454
14700	0.27309	0.27202	0.22313	0.23188	0.20948	0.07524	0.08585	0.09469	0.00374	0.28907	0.27622	0.19708	0.19569	0.25615	0.11117	0.06478	0.10441	0.00752	0.28659	0.28113	0.19919	0.22084	0.21882	0.0966	0.07749	0.09982	0.00458
14910	0.27347	0.27201	0.2233	0.23204	0.20942	0.07542	0.08596	0.09486	0.00381	0.28906	0.27639	0.19738	0.19558	0.25645	0.11135	0.06485	0.10463	0.00749	0.28677	0.28135	0.19939	0.22108	0.2189	0.0969	0.07767	0.09988	0.0046
15120	0.27331	0.27189	0.22335	0.23205	0.20969	0.07565	0.08595	0.095	0.00382	0.2889	0.27615	0.19726	0.19583	0.25638	0.11129	0.06496	0.10472	0.00761	0.28672	0.28113	0.19934	0.22108	0.21878	0.09696	0.07767	0.10002	0.00463
15330	0.2734	0.27225	0.22364	0.23207	0.21	0.07558	0.08621	0.09518	0.00382	0.28934	0.27656	0.19772	0.1959	0.25658	0.11153	0.06509	0.10484	0.00766	0.28714	0.28158	0.19943	0.22138	0.21908	0.09705	0.07776	0.10004	0.00469
15540	0.27355	0.27231	0.22376	0.23247	0.21012	0.07595	0.08638	0.09533	0.00383	0.28983	0.2766	0.19767	0.19608	0.25698	0.11171	0.06531	0.10494	0.00767	0.28738	0.28173	0.19962	0.22161	0.21915	0.09722	0.07795	0.10032	0.00465
15750	0.27356	0.2722	0.2239	0.2327	0.21019	0.0759	0.08632	0.09549	0.00385	0.28959	0.27673	0.19781	0.19624	0.25692	0.11176	0.0652	0.10514	0.0077	0.2874	0.2817	0.19971	0.22192	0.21921	0.09723	0.07788	0.10052	0.00469
15960	0.27389	0.27266	0.22392	0.23279	0.21023	0.07594	0.08639	0.09535	0.0039	0.28957	0.27675	0.19768	0.19633	0.25709	0.11178	0.06537	0.1051	0.00778	0.28728	0.28196	0.19985	0.22195	0.2193	0.09731	0.07792	0.10046	0.00471
16170	0.27406	0.27255	0.22407	0.23294	0.21026	0.07619	0.0865	0.09543	0.00393	0.28988	0.2767	0.19798	0.19653	0.25692	0.11203	0.06531	0.10522	0.00786	0.2875	0.28212	0.19983	0.22193	0.21967	0.09742	0.07795	0.10059	0.00479
16380	0.27411	0.27267	0.22413	0.23286	0.21048	0.07617	0.08651	0.09555	0.00393	0.28974	0.27695	0.19783	0.19658	0.2571	0.11217	0.06534	0.10541	0.00789	0.28728	0.28189	0.19998	0.2221	0.21947	0.09757	0.0782	0.10063	0.00479
16590	0.2737	0.27264	0.22432	0.23325	0.21046	0.07632	0.08676	0.09564	0.00394	0.28953	0.27664	0.19809	0.19669	0.25716	0.11211	0.06545	0.10536	0.00793	0.28741	0.28188	0.20006	0.22246	0.21972	0.09774	0.07827	0.10063	0.00483
16800	0.2738	0.27282	0.22442	0.23325	0.21075	0.07644	0.08681	0.09581	0.00397	0.2897	0.27691	0.19817	0.19697	0.25741	0.1122	0.06551	0.10568	0.00802	0.28789	0.28195	0.20001	0.22232	0.21962	0.09787	0.07823	0.10102	0.00486
17010	0.27409	0.27288	0.2244	0.23364	0.21077	0.07656	0.08678	0.09599	0.004	0.2899	0.27722	0.19832	0.19701	0.25796	0.11245	0.06554	0.10576	0.00796	0.28767	0.28219	0.20002	0.22242	0.21998	0.098	0.07841	0.10106	0.00483
17220	0.2742	0.27281	0.22444	0.23366	0.21102	0.07662	0.08684	0.09614	0.00399	0.28994	0.27691	0.19834	0.19693	0.25735	0.11246	0.06575	0.10568	0.00796	0.28765	0.28212	0.20019	0.22251	0.21983	0.09786	0.07846	0.10116	0.00496
17430	0.27427	0.2729	0.22465	0.23362	0.21108	0.07688	0.08702	0.09604	0.00405	0.28994	0.27725	0.19842	0.19718	0.25766	0.11271	0.0656	0.1058	0.00798	0.28794	0.28225	0.20025	0.22248	0.22001	0.09809	0.07848	0.10112	0.00498
17640	0.27428	0.27332	0.22464	0.23386	0.21101	0.07699	0.08698	0.09612	0.00406	0.28979	0.27718	0.19848	0.19694	0.25768	0.11266	0.0658	0.10574	0.00807	0.28815	0.28259	0.20037	0.2227	0.22036	0.09809	0.07847	0.10145	0.00495
17850	0.27432	0.27296	0.22455	0.23373	0.21125	0.07689	0.08698	0.09615	0.0041	0.29008	0.27715	0.19864	0.1973	0.25765	0.11264	0.06599	0.10585	0.00809	0.28806	0.28258	0.20038	0.22289	0.22011	0.09815	0.07863	0.10142	0.00494
18060	0.27397	0.27296	0.22445	0.23378	0.2113	0.07695	0.08695	0.09608	0.00409	0.28984	0.27691	0.19845	0.1972	0.25782	0.11274	0.06582	0.10598	0.00805	0.2877	0.28243	0.20034	0.22287	0.22036	0.09833	0.07864	0.10142	0.00499
18270	0.27445	0.27334	0.22485	0.2339	0.21134	0.07712	0.08716	0.09642	0.00413	0.29013	0.27744	0.19855	0.19746	0.25796	0.11287	0.06595	0.10602	0.00817	0.28818	0.28255	0.20046	0.22299	0.2202	0.0982	0.07863	0.10144	0.00501
18480	0.27462	0.27317	0.2248	0.23416	0.21153	0.07719	0.08721	0.09655	0.00413	0.2903	0.2772	0.19859	0.1974	0.25825	0.11294	0.06596	0.10602	0.00819	0.28826	0.28232	0.20045	0.22288	0.22036	0.09849	0.07889	0.1016	0.00508
18690	0.27499	0.27335	0.22516	0.23421	0.21159	0.07716	0.08724	0.0966	0.00415	0.29008	0.27732	0.19861	0.1974	0.258	0.11309	0.06609	0.10613	0.00824	0.2883	0.28257	0.20053	0.22272	0.22039	0.09837	0.07878	0.10168	0.00507
18900	0.27451	0.27318	0.22467	0.23421	0.21169	0.07762	0.08746	0.09653	0.00422	0.29047	0.27738	0.19875	0.19779	0.25813	0.11307	0.0662	0.1063	0.00828	0.28822	0.28277	0.20052	0.22315	0.22017	0.09867	0.07885	0.10184	0.00516
19110	0.2748	0.27346	0.22524	0.23446	0.21195	0.07751	0.08743	0.09679	0.00421	0.29041	0.27769	0.1991	0.19774	0.25828	0.11316	0.0662	0.10641	0.00832	0.28834	0.28285	0.20076	0.22347	0.22076	0.09878	0.07911	0.10198	0.00512
19320	0.27502	0.27348	0.22526	0.2349	0.21199	0.07738	0.08758	0.0967	0.00424	0.29046	0.27756	0.19912	0.19812	0.25829	0.11324	0.06622	0.10648	0.00833	0.28821	0.28265	0.20056	0.22344	0.22048	0.09861	0.07885	0.10196	0.00517
19530	0.27497	0.27367	0.2256	0.23465	0.2121	0.07759	0.0876	0.09672	0.00424	0.29071	0.27764	0.1994	0.19831	0.2584	0.11338	0.06629	0.10684	0.00828	0.28837	0.28306	0.20098	0.22367	0.22067	0.099	0.07912	0.1021	0.00518
19740	0.27503	0.27354	0.22553	0.23525	0.21239	0.07763	0.08766	0.09706	0.00426	0.29065	0.27794	0.19915	0.19819	0.25842	0.11352	0.06629	0.10667	0.00832	0.28843	0.28319	0.20097	0.22342	0.22068	0.09902	0.07908	0.10228	0.00522
19950	0.2753	0.27382	0.22561	0.23499	0.21236	0.07787	0.08783	0.09715	0.00432	0.29079	0.27815	0.19932	0.19843	0.2585	0.11363	0.06656	0.10696	0.00844	0.2888	0.28332	0.20128	0.22396	0.22095	0.09902	0.07924	0.10228	0.00523
20160	0.27538	0.27409	0.22606	0.23521	0.21241	0.0779	0.0877	0.09715	0.00427	0.29088	0.27814	0.19954	0.19857	0.25883	0.11369	0.06645	0.10691	0.00842	0.28872	0.283	0.20102	0.22387	0.22092	0.09913	0.07934	0.10239	0.00528
20370	0.27536	0.27396	0.22607	0.23521	0.21247	0.07801	0.08806	0.09735	0.00434	0.29067	0.27793	0.19959	0.19843	0.25894	0.11371	0.06665	0.10711	0.0085	0.28884	0.28342	0.20108	0.22403	0.22109	0.09924	0.0794	0.10245	0.00527
20580	0.27575	0.27407	0.22584	0.23561	0.21277	0.07811	0.08803	0.09734	0.00433	0.29098	0.27803	0.1998	0.1985	0.25862	0.11379	0.06669	0.10713	0.0085	0.28878	0.28337	0.20132	0.2241	0.22094	0.09937	0.07971	0.10246	0.00525
20790	0.27572	0.27412	0.22601	0.23543	0.21286	0.07815	0.08808	0.09737	0.00439	0.29114	0.27822	0.19984	0.19851	0.25894	0.11396	0.0667	0.10724	0.00854	0.28872	0.28335	0.2014	0.22426	0.22108	0.09938	0.07946	0.10273	0.00533
21000	0.27597	0.27423	0.22604	0.23574	0.21313	0.07825	0.08806	0.0975	0.0044	0.2913	0.27824	0.20004	0.19875	0.25881	0.11404	0.06682	0.10721	0.00858	0.28911	0.28352	0.2011	0.22435	0.22123	0.0994	0.07957	0.10273	0.00533
